# Supplementary material for: Comparison of Methods to Identify and Monitor Mold Damages in Buildings
Source: MDPI journal article supplement (doi:10.3390/app12189372), 2022-09-19
Supplement: s1 [file s1]

## Supplementary Tables S2 and S3

**Table S2.** Comparison of fungi detected in different substrates by using microscopy (mold samples) and DNA metabarcoding (both mold and dust samples from the same damaged room). Data from the fourteen apartments that only include dust samples from the damaged rooms.

| Mold sample      | Apartment | Material; visual aspect | Microscopy results                                                                                                        | Fungal DNA metabarcoding data (genus level) |                  |                                   |
|------------------|-----------|-------------------------|---------------------------------------------------------------------------------------------------------------------------|---------------------------------------------|------------------|-----------------------------------|
|                  |           |                         |                                                                                                                           | Major fungi in Mold sample (RA > 1%)        | RA (%)           | Presence in Dust Damaged room (%) |
| M16              | 4         | Chipboard               | <i>Chaetomium globosum</i>                                                                                                | <i>Naganishia</i>                           | 37.7             | 0.05                              |
|                  |           |                         |                                                                                                                           | <i>Chaetomium</i>                           | 32.4             | 27.8                              |
|                  |           |                         |                                                                                                                           | <i>Rhodotorula</i>                          | 23.7             | 4.5                               |
|                  |           |                         |                                                                                                                           | <i>Aspergillus</i>                          | 1.5              | 8.5                               |
| M27              | 10        | Wood                    | <i>Bjerkandera adusta</i>                                                                                                 | <i>Stachybotrys</i>                         | 64.7             | 0.4                               |
|                  |           |                         |                                                                                                                           | <i>Aspergillus</i>                          | 28.4             | 0.3                               |
|                  |           |                         |                                                                                                                           | <i>Bjerkandera</i>                          | 5.3              | 45.8                              |
|                  |           |                         |                                                                                                                           | <i>Penicillium</i>                          | 1.5              | 0.3                               |
| M28 <sup>1</sup> | 11        | Wall paper              | <i>Pseudoallescheria</i> sp.                                                                                              | NA <sup>1</sup>                             | 52.2             |                                   |
|                  |           |                         |                                                                                                                           | <i>Wallemia</i>                             | 24.6             | 0.1                               |
|                  |           |                         |                                                                                                                           | <i>Aspergillus</i>                          | 21.7             | 3.2                               |
|                  |           |                         |                                                                                                                           | <i>Penicillium</i> sp.                      | <1% <sup>2</sup> |                                   |
| M29              | 12        | Wood                    | <i>Cladosporium</i> sp.<br><i>Ulocladium</i> sp.<br><i>Phoma glomerata</i><br><i>Aspergillus/Penicillium</i> <sup>2</sup> | <i>Alternaria</i>                           | 60.3             | 20.5                              |
|                  |           |                         |                                                                                                                           | <i>Epicoccum</i>                            | 29.5             | 3.2                               |
|                  |           |                         |                                                                                                                           | <i>Rhodotorula</i>                          | 5.5              | 0.2                               |
|                  |           |                         |                                                                                                                           | <i>Cladosporium</i>                         | 4.2              | 33.8                              |
|                  |           |                         |                                                                                                                           | <1% <sup>2</sup>                            |                  |                                   |
|                  |           |                         |                                                                                                                           |                                             |                  |                                   |
| M31 <sup>1</sup> | 14        | Gypsum board            | <i>Chaetomium globosum</i>                                                                                                | <i>Chaetomium</i>                           | 54.7             | 17.9                              |
|                  |           |                         |                                                                                                                           | <i>Aspergillus</i>                          | 18.2             | 1.4                               |
|                  |           |                         |                                                                                                                           | NA <sup>1</sup>                             | 16               |                                   |
|                  |           |                         |                                                                                                                           | <i>Penicillium</i>                          | 10.6             | 12.9                              |
| M37              | 16        | Paint on the ceiling    | <i>Acremonium</i> sp.<br><i>Ulocladium</i> sp.                                                                            | <i>Alternaria</i>                           | 84.1             | 22.2                              |
|                  |           |                         |                                                                                                                           | <i>Acremonium</i>                           | 7.4              | 0.05                              |
|                  |           |                         |                                                                                                                           | <i>Cladosporium</i>                         | 5.5              | 20.8                              |
|                  |           |                         |                                                                                                                           | <i>Meyerozyma</i>                           | 2.4              | 0.08                              |
| M43              | 18        | Gypsum board            | <i>Scopulariopsis brevicaulis</i><br><i>Penicillium</i> sp. <sup>2</sup>                                                  | <i>Chaetomium</i>                           | 62.6             | 0.6                               |
|                  |           |                         |                                                                                                                           | <i>Aspergillus</i>                          | 35.7             | 3.3                               |
|                  |           |                         |                                                                                                                           | <1% <sup>2</sup>                            |                  |                                   |
| M44              | 19        | MDF                     | <i>Aspergillus glaucus</i>                                                                                                | <i>Aspergillus</i>                          | 95.5             | 0.7                               |
|                  |           |                         |                                                                                                                           | <i>Penicillium</i>                          | 3.5              | 12.6                              |
| M46              | 20        | MDF                     | <i>Penicillium</i> sp.<br><i>Chaetomium globosum</i>                                                                      | <i>Penicillium</i>                          | 69.5             | 1.4                               |
|                  |           |                         |                                                                                                                           | <i>Chaetomium</i>                           | 28.9             | 0.08                              |
|                  |           |                         |                                                                                                                           | <i>Naganishia</i>                           | 1.1              | 4                                 |

|     |    |              |                                                         |                        |      |      |
|-----|----|--------------|---------------------------------------------------------|------------------------|------|------|
| M49 | 21 | MDF          | <i>Chaetomium globosum</i>                              | <i>Chaetomium</i>      | 70.3 | 0.6  |
|     |    |              |                                                         | <i>Penicillium</i>     | 24   | 2    |
|     |    |              | <i>Aspergillus versicolor</i>                           | <i>Aspergillus</i>     | 5.4  | 1    |
| M50 | 22 | Gypsum board | <i>Chaetomium globosum</i>                              | <i>Chaetomium</i>      | 79.3 | 0.06 |
|     |    |              | <i>Aspergillus/Penicillium</i>                          | <i>Aspergillus</i>     | 12.9 | 1.4  |
|     |    |              |                                                         | <i>Penicillium</i>     | 4.4  | 1.1  |
|     |    |              |                                                         | <i>Filobasidium</i>    | 2.2  | 0.4  |
| M54 | 25 | Gypsum board | <i>Stachybotrys chartarum</i><br><i>Penicillium</i> sp. | <i>Stachybotrys</i>    | 99.4 | 8.9  |
| M56 | 27 | Gypsum board | <i>Stachybotrys chartarum</i>                           | <i>Stachybotrys</i>    | 84.5 | 22   |
|     |    |              |                                                         | <i>Talaromyces</i>     | 11.6 | 0.02 |
|     |    |              | <i>Chaetomium</i> sp.                                   | <i>Chaetomium</i>      | 2.1  | 6    |
|     |    |              | <i>Penicillium</i> sp.                                  | <i>Penicillium</i>     | 1.3  | 1.2  |
| M59 | 28 | Gypsum board | <i>Stachybotrys chartarum</i>                           | <i>Stachybotrys</i>    | 40.4 | 0.6  |
|     |    |              | <i>Chaetomium globosum</i>                              | <i>Chaetomium</i>      | 24.4 | 2.5  |
|     |    |              | <i>Aspergillus versicolor</i>                           | <i>Aspergillus</i>     | 17.4 | 8.5  |
|     |    |              |                                                         | <i>Mucor</i>           | 2.9  | 25.2 |
|     |    |              |                                                         | <i>Penicillium</i>     | 2.8  | 11.9 |
|     |    |              |                                                         | <i>Sphaerosporella</i> | 1.5  | 2.9  |
|     |    |              |                                                         | <i>Pyrenochaeta</i>    | 1    |      |
|     |    |              | <i>Acremonium</i> sp. <sup>2</sup>                      | <1% <sup>2</sup>       |      |      |
| M60 | 28 | Gypsum board | <i>Stachybotrys chartarum</i>                           | <i>Stachybotrys</i>    | 61.9 | 20.6 |
|     |    |              | <i>Chaetomium globosum</i>                              | <i>Chaetomium</i>      | 21.5 | 12.7 |
|     |    |              |                                                         | <i>Alternaria</i>      | 6.2  | 3.4  |
|     |    |              |                                                         | <i>Oidiodendron</i>    | 5.2  | 0.3  |
|     |    |              | <i>Aspergillus</i> sp.                                  | <i>Aspergillus</i>     | 2.6  | 8.4  |
|     |    |              | <i>Ulocladium</i> sp.                                   |                        |      |      |
|     |    |              | <i>Ascotricha erinacea</i>                              |                        |      |      |
|     |    |              | <i>Sepedonium</i> sp.                                   |                        |      |      |

<sup>1</sup> High percentages of non-assigned (NA) genera (16-52 %) were reported for the mold samples M28 and M31, compared to the rest of samples (5.9 % of NA genera for mold samples on average).

<sup>2</sup> Genera detected in mold samples by DNA metabarcoding with RA<1%.

**Supplementary Table S3.** Comparison of fungi detected in mold samples by using both microscopy and DNA metabarcoding - data from eight apartments that only include mold samples.

| Mold sample | Apartment | Material; visual aspect  | Microscopy results                                                               | Major fungi by DNA metabarcoding (RA > 1%) | RA (%) |
|-------------|-----------|--------------------------|----------------------------------------------------------------------------------|--------------------------------------------|--------|
| M4          | 1         | Gypsum board; Black mold | Cladosporium sp.                                                                 | Cladosporium                               | 27.1   |
|             |           |                          |                                                                                  | Alternaria                                 | 25.9   |
|             |           |                          | Acremonium sp                                                                    | Acremonium                                 | 20.5   |
|             |           |                          |                                                                                  | Sarocladium                                | 12.7   |
|             |           |                          |                                                                                  | Sporobolomyces                             | 4.6    |
|             |           |                          |                                                                                  | Phaffia                                    | 2.1    |
|             |           |                          |                                                                                  | Vishniacozyma                              | 1.1    |
|             |           |                          |                                                                                  | Ulocladium sp.                             |        |
| M7          | 2         | Plastic                  | Cladosporium sp.                                                                 | Boletus                                    | 48.8   |
|             |           |                          |                                                                                  | Cladosporium                               | 30.9   |
|             |           |                          |                                                                                  | Penicillium                                | 19.3   |
| M15         | 4         | Building paper           | Unidentified molds                                                               | Stachybotrys                               | 78.4   |
|             |           |                          |                                                                                  | Chaetomium                                 | 21.3   |
|             |           |                          |                                                                                  |                                            |        |
| M17         | 5         | Wood; rot signs          | Coniophora puteana                                                               | Aspergillus                                | 94.1   |
|             |           |                          |                                                                                  | Penicillium                                | 1.3    |
|             |           |                          |                                                                                  | Serpula                                    | 1.1    |
|             |           |                          |                                                                                  |                                            |        |
| M18         | 5         | Wood; rot signs          | Coniophora puteana                                                               | Serpula                                    | 49.9   |
|             |           |                          |                                                                                  | Aspergillus                                | 37.6   |
|             |           |                          |                                                                                  | Penicillium                                | 5.8    |
|             |           |                          |                                                                                  | Wallemia                                   | 1.7    |
|             |           |                          |                                                                                  | Blastobotrys                               | 1.7    |
| M19         | 6         | Chipboard                | Aspergillus / Penicillium                                                        | Aspergillus                                | 97.8   |
|             |           |                          |                                                                                  | Byssoschlamys                              | 2      |
|             |           |                          |                                                                                  | Unidentified molds                         |        |
| M21         | 6         | Wood                     | Trichoderma sp.                                                                  | Trichoderma                                | 89     |
|             |           |                          |                                                                                  | Peziza                                     | 9.5    |
|             |           |                          | Chaetomium sp.<br>Stachybotrys chartarum<br>Aspergillus niger<br>Penicillium sp. |                                            |        |
|             |           |                          |                                                                                  |                                            |        |
|             |           |                          |                                                                                  |                                            |        |
| M22         | 7         | Gypsum board             | Ascotricha erenacea                                                              | Ascotricha                                 | 57.7   |
|             |           |                          |                                                                                  | Cyphellophora                              | 22.6   |
|             |           |                          |                                                                                  | Tritirachium                               | 8.3    |
|             |           |                          |                                                                                  | Beauveria                                  | 3      |
|             |           |                          |                                                                                  | Aspergillus                                | 2.8    |
|             |           |                          |                                                                                  | Microascus                                 | 1.7    |
| M26         | 9         | Gypsum board             | Acremonium sp.                                                                   | Acremonium                                 | 64.9   |
|             |           |                          |                                                                                  | Aspergillus                                | 12.9   |
|             |           |                          |                                                                                  | Unidentified black fungi                   |        |

|     |    |           |                         |                     |      |
|-----|----|-----------|-------------------------|---------------------|------|
| M55 | 26 | Chipboard | <i>Aspergillus</i> sp.  | <i>Aspergillus</i>  | 44.3 |
|     |    |           | <i>Tritirachium</i> sp. | <i>Tritirachium</i> | 30.2 |
|     |    |           | <i>Cladosporium</i> sp. | <i>Cladosporium</i> | 5.9  |
|     |    |           | <i>Acremonium</i> sp.   | <i>Acremonium</i>   | 3.5  |
|     |    |           |                         | <i>Fusarium</i>     | 3    |

<sup>1</sup> High percentages of non-assigned (NA) genera (16-52 %) were reported for the mold samples M28 and M31, compared to the rest of samples (5.9 % of NA genera for mold samples on average).

<sup>2</sup> Genus detected by DNA metabarcoding with RA<1%.
